# Supplementary material
Source: PubMed Central journal article supplement (PMC2663927)

## Supplementary Figure Legends

**Figure S1. Rapid divergence of the non-kinase domain in Hsl1p orthologs and paralogs.** **A)** Homology scans were conducted as described in the Experimental Procedures using ClustalW alignments of Hsl1p orthologs from *S. cerevisiae* and *A. gossypii* and *K. lactis* (top), *C. albicans* (middle), and *S. pombe* Nim1 (bottom). *S. cerevisiae* diverged from *A. gossypii* and *K. lactis* over 100 million years ago. The last common ancestor of *S. cerevisiae* and *C. albicans* lived 200-800 million years ago. **B)** Homology scan of *S. cerevisiae* paralogs Hsl1p, Gin4p, and Kcc4p aligned using ClustalW.

**Figure S2. Cdc28p tyrosine phosphorylation in strains with Hsl1p regional deletions.** **A)** Top: schematic of Hsl1p with regions indicated. Western blots of total cell lysates (NP40 lysis) probed with anti-phospho-Y19-Cdc28p and anti-PSTAIR (total Cdc28p) antibodies: mutants with high Hsl1p function show low Cdc28p phosphorylation. Functional Hsl1p promotes degradation of Swe1p, thereby lowering the amount of tyrosine phosphorylated Swe1p substrate, Cdc28p (Cdk1). **B)** DIC images of double-mutant strains containing Hsl1p regional deletions and *mih1* $\Delta$ .

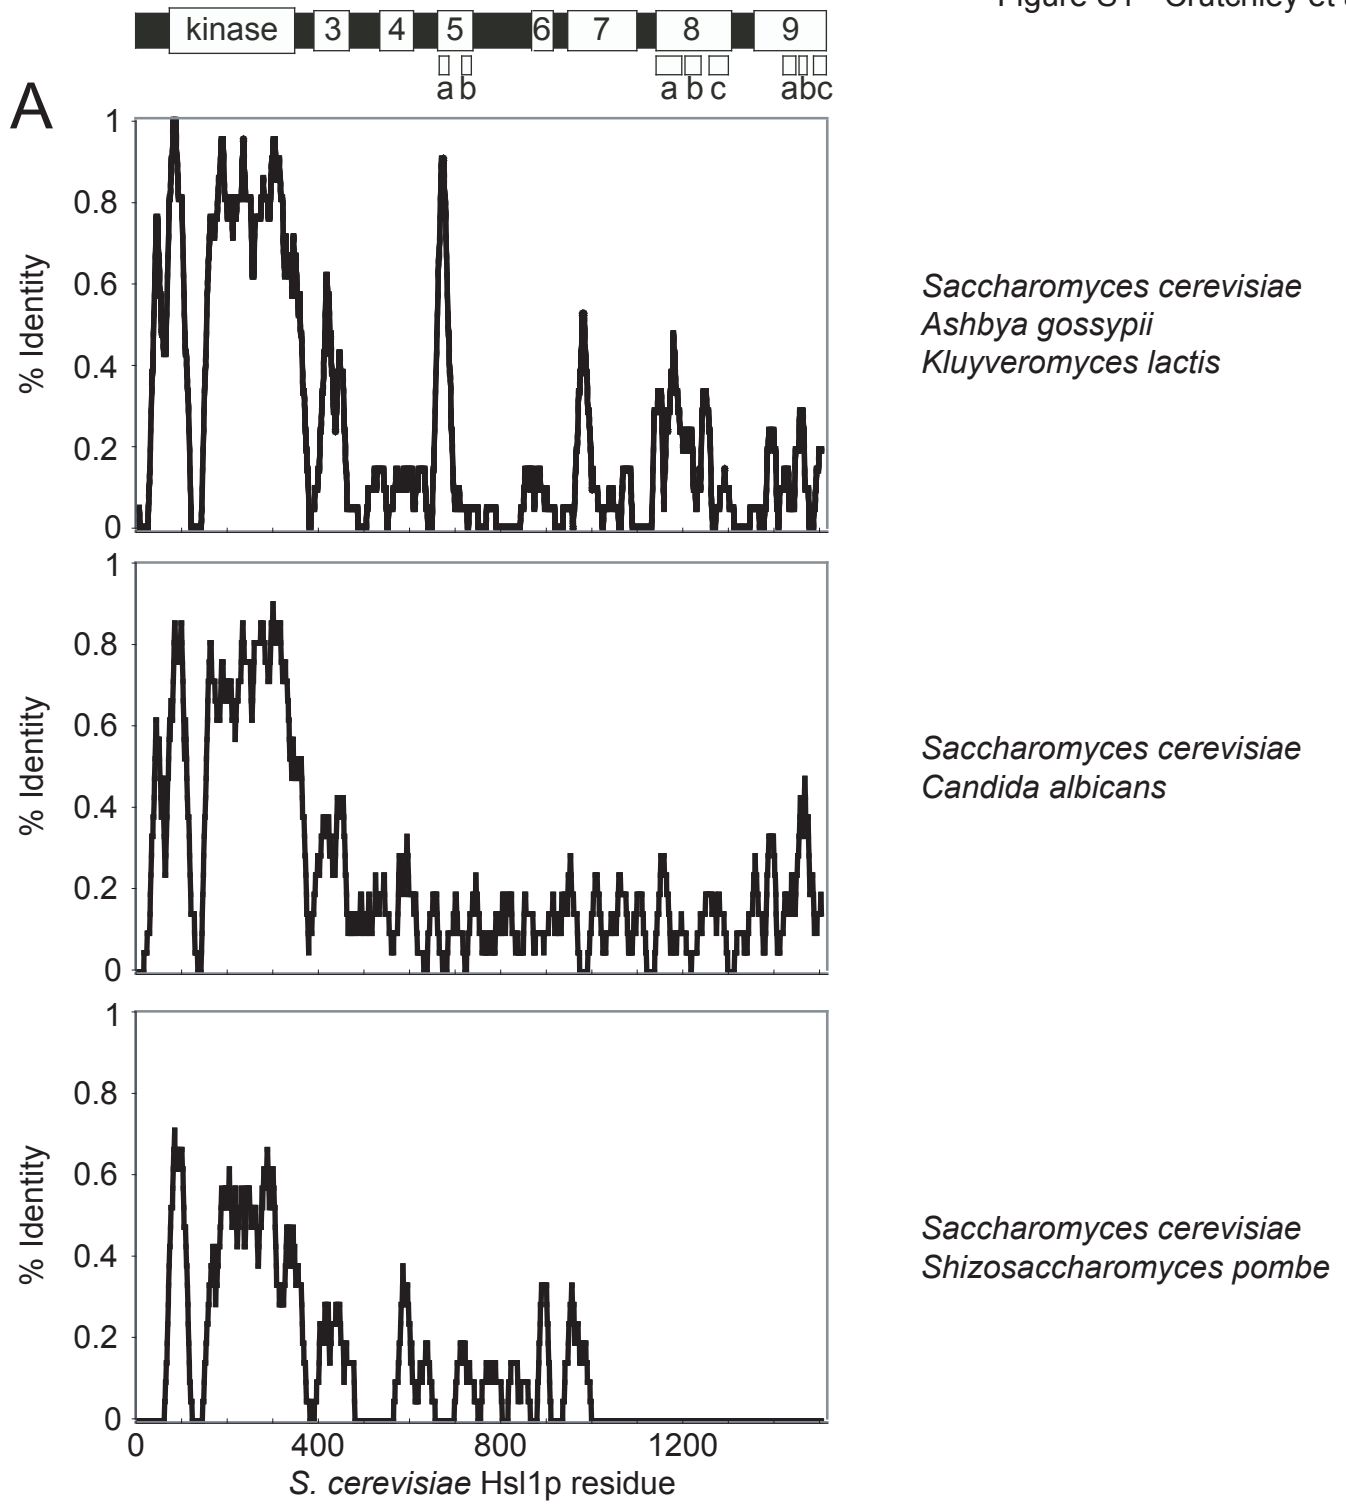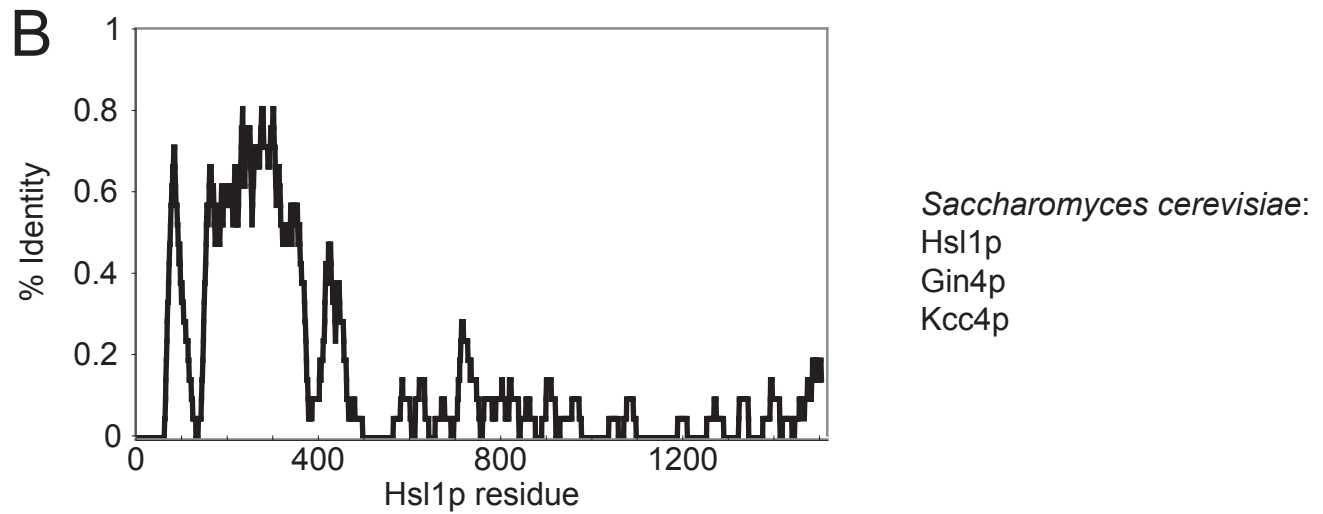

Figure S2 - Cruchley et al.

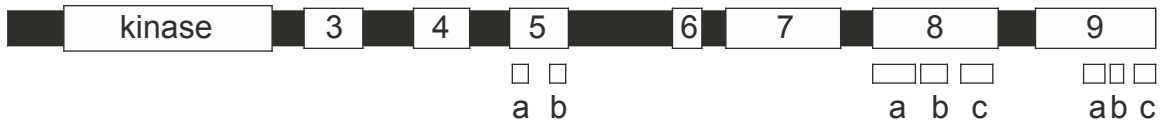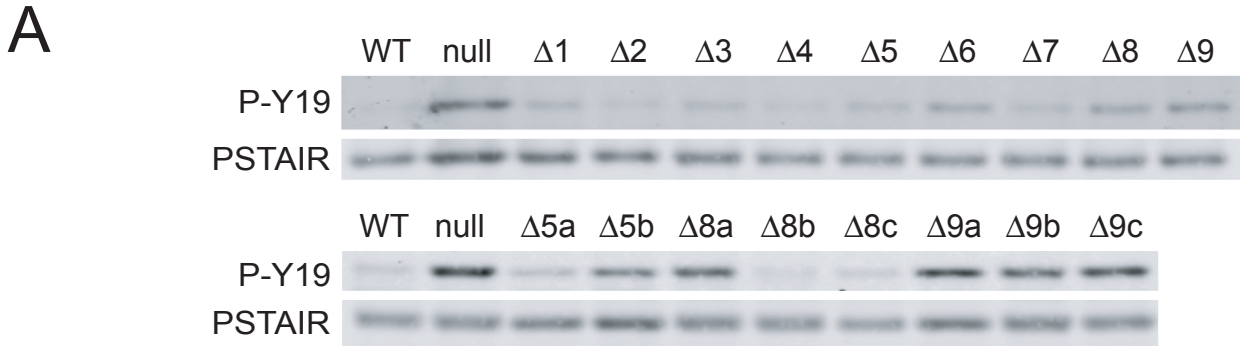

**B** Rescue of *mih1Δ hsl1Δ*:

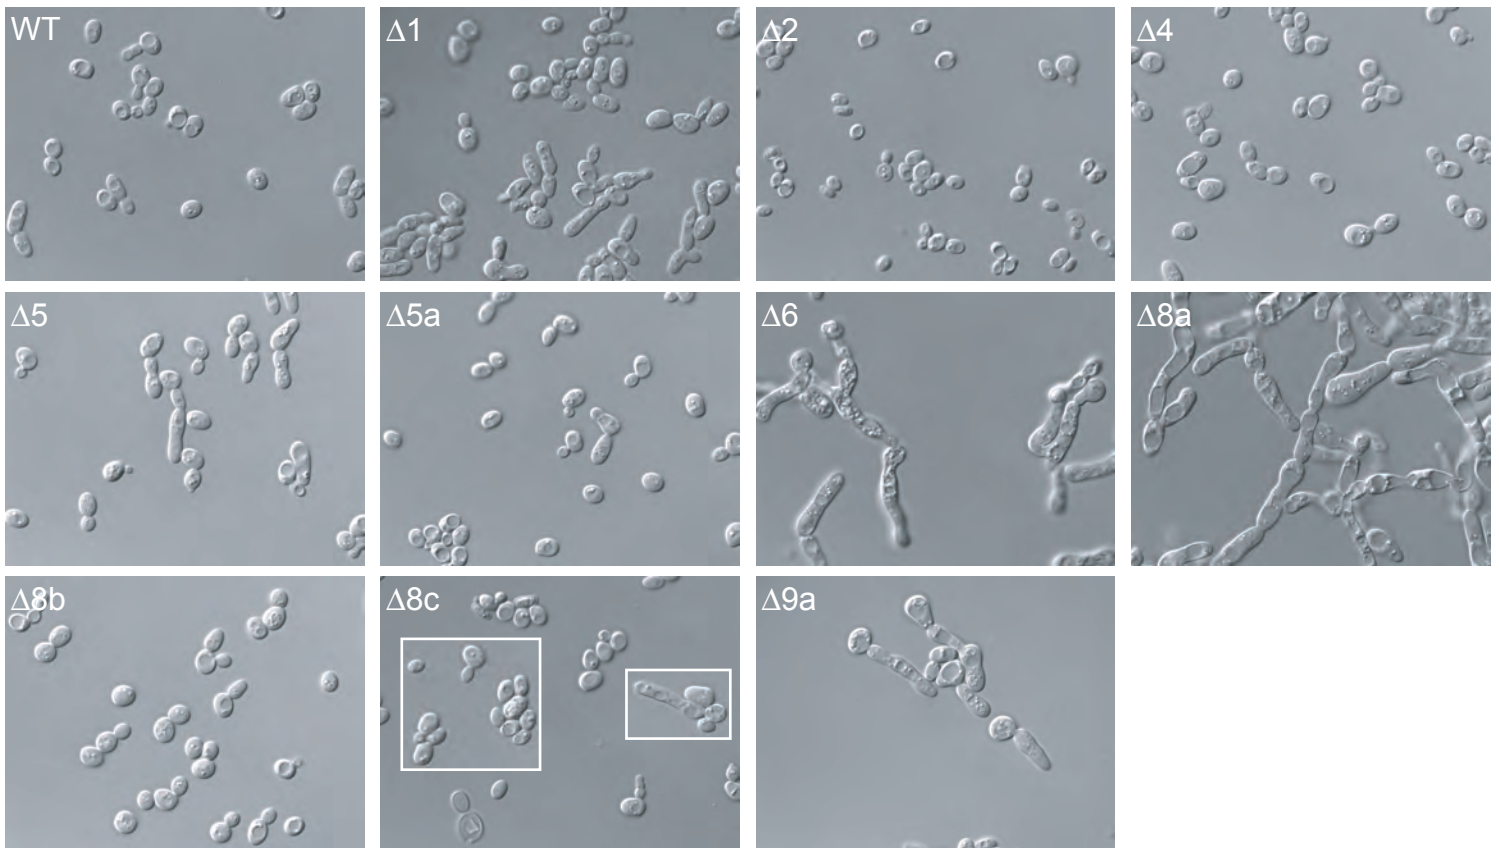

Supplement: E08-08-0848_1.pdf [file E08-08-0848_1.pdf]
